# Supplementary material
Source: PubMed Central journal article supplement (PMC8934569)

## **SUPPLEMENTARY INFORMATION Figures and Tables - Online only**

### **Supplementary Information Figure Legends**

FIG S1. Pharmacokinetics of veliparib. (A) Mean (+SD) veliparib  $C_{max}$  vs veliparib dose Cycle 2 Day 1. (B) Mean (+SD)  $AUC_{0-7}$  vs veliparib dose Cycle 2 Day 1.

FIG S2. (A) Whole blood cyclophosphamide and (B) 4-OH cyclophosphamide concentration-time plots Cycle 1 Day 3.

FIG S3.  $\gamma$ H2AX content in paired tumor biopsies after treatment with veliparib and AC.  $\gamma$ H2AX assessed pre-treatment (open circles) and post-treatment on Cycle 1 Day 2 (closed circles).

^, Pre-treatment <LLQ, #, Post-treatment <LLQ.

Figure S3

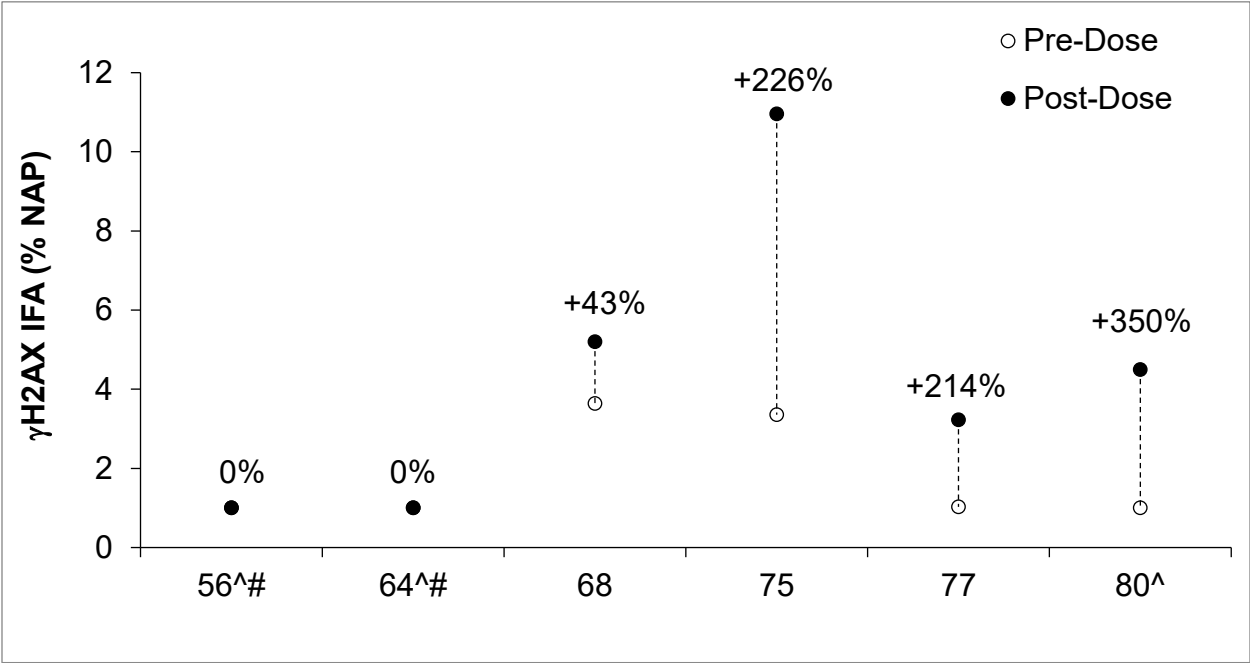

Supplement: NIHMS1785093-supplement-5.pdf [file NIHMS1785093-supplement-5.pdf]
